# Supplementary material
Source: MDPI journal article supplement (https://www.mdpi.com/2073-4344/13/11/1450)
Supplement: s1 [file s1]

## Supplementary Materials

### S-scheme $\text{WO}_3/\text{SnIn}_4\text{S}_8$ heterojunction for water purification: Enhanced photocatalytic performance and mechanism

Pingfan Xu <sup>1,2</sup>, Runqiu Zhang <sup>1</sup>, Jiarong Gong <sup>1</sup>, Yaofa Luo <sup>1</sup>, Yihua Zhuang <sup>1,\*</sup> and Peikun Zhang <sup>1,\*</sup>

<sup>1</sup> School of Advanced manufacturing, Fuzhou University, Jinjiang 362200, China

<sup>2</sup> Key Laboratory of Ecological Environment and Information Atlas, Fujian Provincial University, Putian 351100, China

\* Correspondence: yhzhuang@fzu.edu.cn (Y.Z.); pkzhang@fzu.edu.cn (P.Z.)

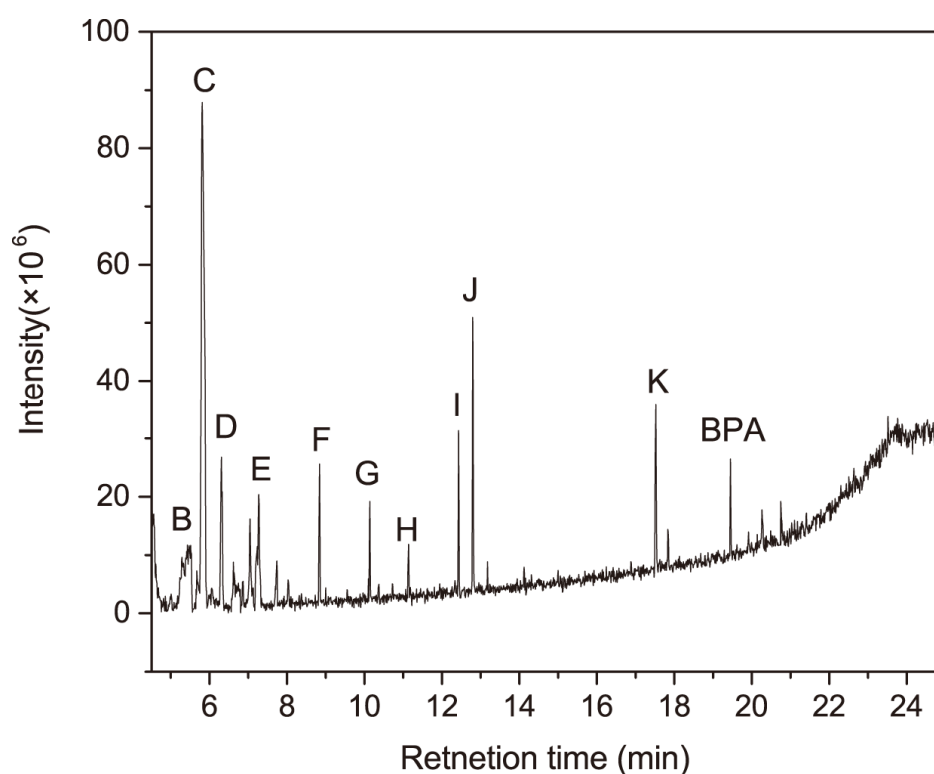

**Figure S1.** GC chromatogram of BPA after 4h degradation.

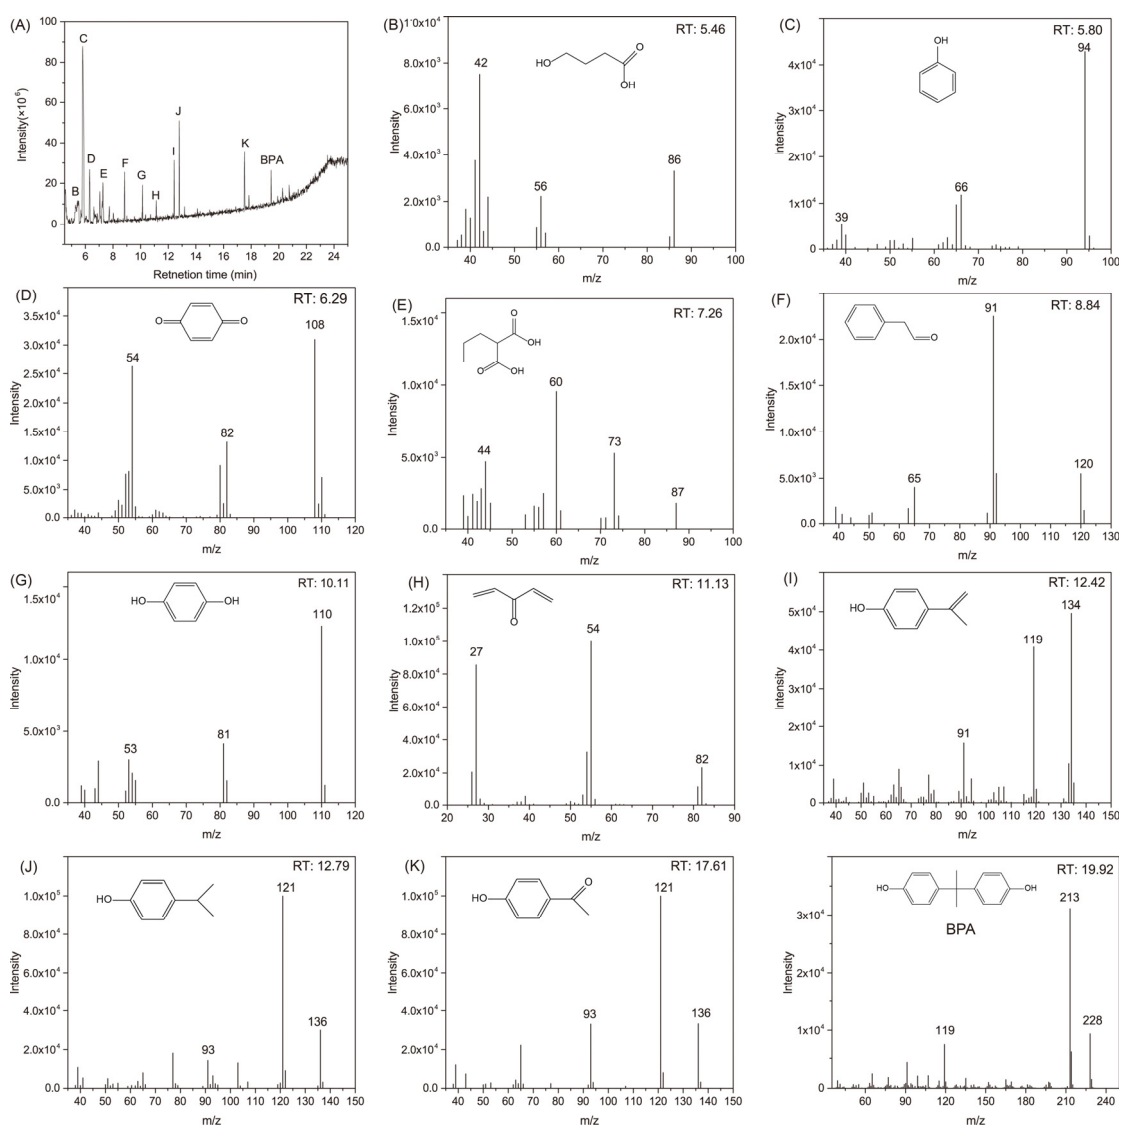

Figure S2 Mass spectrum of the intermediate products of BPA after 4h degradation

Table S1. GC-MS data of the photodegradation products of BPA by WSL.

| Compounds                 | Chemical formula                               | Retention time(min) | m/z |
|---------------------------|------------------------------------------------|---------------------|-----|
| γ-Hydroxybutyric acid(B)  | C <sub>4</sub> H <sub>8</sub> O <sub>3</sub>   | 5.46                | 86  |
| Phenol(C)                 | C <sub>6</sub> H <sub>6</sub> O                | 5.80                | 94  |
| p-benzoquinone(D)         | C <sub>6</sub> H <sub>4</sub> O <sub>2</sub>   | 6.29                | 108 |
| propylmalonic acid(E)     | C <sub>6</sub> H <sub>10</sub> O <sub>4</sub>  | 7.26                | 87  |
| phenylacetaldehyde(F)     | C <sub>8</sub> H <sub>8</sub> O                | 8.84                | 120 |
| hydroquinone(G)           | C <sub>6</sub> H <sub>6</sub> O <sub>2</sub>   | 10.11               | 110 |
| Penta-1,4-dien-3-one(H)   | C <sub>5</sub> H <sub>6</sub> O                | 11.13               | 82  |
| 4-isopropenylphenol (I)   | C <sub>9</sub> H <sub>12</sub> O               | 12.42               | 134 |
| 4-isopropylphenol (J)     | C <sub>9</sub> H <sub>10</sub> O               | 12.79               | 136 |
| p-Hydroxyacetophenone (K) | C <sub>8</sub> H <sub>8</sub> O <sub>2</sub>   | 17.61               | 136 |
| BPA                       | C <sub>15</sub> H <sub>16</sub> O <sub>2</sub> | 19.92               | 228 |

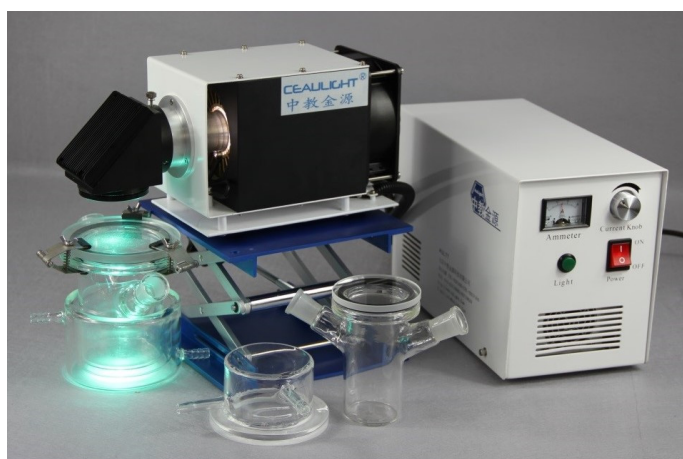

**Figure S3.** Schematic diagram of photocatalytic reactor.
